# Supplementary material
Source: MDPI journal article supplement (https://www.mdpi.com/2076-3417/11/20/9552)
Supplement: s1 [file s1]

## Supplementary Tables

Table S1 – Fungi reported on historical stained glass windows and glazed tiles in the literature.

| Division <sup>1</sup> | Specie                              | Ident. Method <sup>2</sup> | Tipology      | Type of silicate glass | Date (cent.) <sup>3</sup> | Prov. <sup>4</sup> | Monument/Collection, Country                       | Reference |
|-----------------------|-------------------------------------|----------------------------|---------------|------------------------|---------------------------|--------------------|----------------------------------------------------|-----------|
| Asc                   | <i>Trichoderma longibrachiatum</i>  | Cult-DNA                   | Stained glass | <i>Na-rich</i>         | 20th                      | France             | Basílica Santuário de Nazaré, Brazil               | [36]      |
| Asc                   | <i>Alternaria tenuissima</i>        | DNA                        | Stained glass | <i>K-rich</i>          | 15th                      | German             | King Ferdinand II's collection, Portugal           | [18]      |
| Asc                   | <i>Chaetomium coarctatum</i>        | DNA                        | Stained glass | <i>mixed-alkali</i>    | 17th                      | Swiss              | King Ferdinand II's collection, Portugal           | [18]      |
| Asc                   | <i>Cladosporium langeronii</i>      | DNA                        | Stained glass | <i>mixed-alkali</i>    | 17th                      | Swiss              | King Ferdinand II's collection, Portugal           | [18]      |
| Asc                   | <i>Cladosporium sphaerospermum</i>  | DNA                        | Stained glass | <i>K-rich</i>          | 15th                      | German             | King Ferdinand II's collection, Portugal           | [18]      |
| Asc                   | <i>Cladosporium sphaerospermum</i>  | DNA                        | Stained glass | <i>mixed-alkali</i>    | 17th                      | Swiss              | King Ferdinand II's collection, Portugal           | [18]      |
| Asc                   | <i>Didymella phacae</i>             | DNA                        | Stained glass | <i>K-rich</i>          | 15th                      | German             | King Ferdinand II's collection, Portugal           | [18]      |
| Asc                   | <i>Penicillium brevicompactum</i>   | DNA                        | Stained glass | <i>mixed-alkali</i>    | 17th                      | Swiss              | King Ferdinand II's collection, Portugal           | [18]      |
| Asc                   | <i>Penicillium citreonigrum</i>     | DNA                        | Stained glass | <i>K-rich</i>          | 15th                      | German             | King Ferdinand II's collection, Portugal           | [18]      |
| Asc                   | <i>Penicillium citreonigrum</i>     | DNA                        | Stained glass | <i>mixed-alkali</i>    | 17th                      | Swiss              | King Ferdinand II's collection, Portugal           | [18]      |
| Asc                   | <i>Penicillium roseopurpureum</i>   | DNA                        | Stained glass | <i>mixed-alkali</i>    | 17th                      | Swiss              | King Ferdinand II's collection, Portugal           | [18]      |
| Asc                   | <i>Penicillium sp.</i>              | DNA                        | Stained glass | <i>mixed-alkali</i>    | 17th                      | Swiss              | King Ferdinand II's collection, Portugal           | [18]      |
| Asc                   | <i>Penicillium sp.</i>              | DNA                        | Stained glass | <i>K-rich</i>          | 15th                      | German             | King Ferdinand II's collection, Portugal           | [18]      |
| Bas                   | <i>Sistotrema sp.</i>               | DNA                        | Stained glass | <i>K-rich</i>          | 15th                      | German             | King Ferdinand II's collection, Portugal           | [18]      |
| Asc                   | <i>Aspergillus arenarioides</i>     | Cult-DNA                   | Stained glass | <i>Na-rich</i>         | 20th                      | France             | Basílica Santuário de Nazaré, Brazil               | [36]      |
| Asc                   | <i>Aspergillus fumigatus</i>        | MB                         | Stained glass | <i>n.i.</i>            | 19th                      | German             | Church of St. Michael and Johann Baptist, Belgium  | [37]      |
| Asc                   | <i>Aspergillus fumigatus</i>        | MB                         | Stained glass | <i>K-rich</i>          | 15th                      | Flemish            | Cartuja de Miraflores Monastery, Burgos, Spain     | [21]      |
| Asc                   | <i>Aspergillus penicilloides</i>    | MB                         | Stained glass | <i>K-rich</i>          | 15th                      | Flemish            | Cartuja de Miraflores Monastery, Burgos, Spain     | [21]      |
| Asc                   | <i>Aspergillus restrictus</i>       | MB                         | Stained glass | <i>K-rich</i>          | 15th                      | Flemish            | Cartuja de Miraflores Monastery, Burgos, Spain     | [21]      |
| Asc                   | <i>Aspergillus tamaraii</i>         | MB                         | Stained glass | <i>K-rich</i>          | 15th                      | Flemish            | Cartuja de Miraflores Monastery, Burgos, Spain     | [21]      |
| Asc                   | <i>Aureobasidium pullulans</i>      | MB                         | Stained glass | <i>n.i.</i>            | 19th                      | German             | Church of St. Michael and Johann Baptist in Brakel | [37]      |
| Asc                   | <i>Aureobasidium pullulans</i>      | MB                         | Stained glass | <i>n.i.</i>            | 19th                      | German             | Protestant chapel Stockkämpen;                     | [37]      |
| Asc                   | <i>Capnobotryella renispora</i>     | MB                         | Stained glass | <i>n.i.</i>            | 19th                      | German             | Church of St. Michael and Johann Baptist in Brakel | [37]      |
| Asc                   | <i>Cladosporium cladosporioides</i> | MB                         | Stained glass | <i>K-rich</i>          | 14th                      | Spanish            | Cathedral of Tarragona, Spain                      | [23]      |
| Asc                   | <i>Cladosporium cladosporioides</i> | MB                         | Stained glass | <i>K-rich</i>          | ?                         | Spanish            | Church of Santa Maria del Mar in Barcelona, Spain  | [23]      |
| Asc                   | <i>Cladosporium sp.</i>             | MB                         | Stained glass | <i>K-rich</i>          | ?                         | Spanish            | Church of Santa Maria del Mar in Barcelona, Spain  | [23]      |
| Asc                   | <i>Cladosporium sphaerospermum</i>  | MB                         | Stained glass | <i>K-rich</i>          | 14th                      | Spanish            | Cathedral of Tarragona, Spain                      | [23]      |
| Asc                   | <i>Cladosporium sphaerospermum</i>  | MB                         | Stained glass | <i>K-rich</i>          | ?                         | Spanish            | Church of Santa Maria del Mar in Barcelona, Spain  | [23]      |
| Asc                   | <i>Cladosporium spp.</i>            | MB                         | Stained glass | <i>K-rich</i>          | 13 th                     | Spanish            | Cathedral of Tarragona, Spain                      | [23]      |

|           |                                        |          |               |                          |       |            |                                                                        |      |
|-----------|----------------------------------------|----------|---------------|--------------------------|-------|------------|------------------------------------------------------------------------|------|
| Asc       | <i>Coniosporum perforans</i>           | MB       | Stained glass | <i>n.i.</i>              | 19th  | German     | Church of St. Michael and Johann Baptist in Brakel                     | [37] |
| Asc       | <i>Engyodontium album</i>              | MB       | Stained glass | <i>n.i.</i>              | 19th  | German     | Protestant chapel Stockkämpen                                          | [37] |
| Asc       | <i>Eurotium amstelodami</i>            | MB       | Stained glass | <i>K-rich</i>            | 14 th | Spanish    | Cathedral of Tarragona, Spain                                          | [23] |
| U. fungus | -                                      | MB       | Stained glass | K-rich                   | 13 th | German     | Cathedral of Altenberg, Germany                                        | [47] |
| U. fungus | -                                      | MB       | Stained glass | Na-rich                  | 20th  | German     | Church of Bad Driburg, Germany                                         | [47] |
| U. fungus | -                                      | MB       | Stained glass | Na-rich                  | 19th  | German     | Church of St. Michael and Johann Baptist in Brakel, Belgium            | [47] |
| U. fungus | -                                      | MB       | Stained glass | Pb                       | 19th  | German     | Protestant chapel Stockkämpen, Germany                                 | [47] |
| Asc       | <i>Geomyces asperulatus</i>            | MB       | Stained glass | <i>n.i.</i>              | 19th  | German     | Protestant chapel Stockkämpen, Germany                                 | [37] |
| Asc       | <i>Geomyces pannorum</i>               | MB       | Stained glass | <i>n.i.</i>              | 19th  | German     | Church of St. Michael and Johann Baptist in Brakel, Belgium            | [37] |
| Asc       | <i>Kirschsteiniothelia elaterascus</i> | MB       | Stained glass | <i>n.i.</i>              | 19th  | German     | Protestant chapel Stockkämpen, Germany                                 | [37] |
| Asc       | <i>Leptosphaeria maculan</i>           | MB       | Stained glass | <i>n.i.</i>              | 19th  | German     | Protestant chapel Stockkämpen, Germany                                 | [37] |
| Asc       | <i>Penidiella venezuelensis</i>        | MB       | Stained glass | <i>K-rich</i>            | 13 th | Spanish    | Cathedral of Tarragona, Spain                                          | [23] |
| Asc       | <i>Phoma glomerata</i>                 | MB       | Stained glass | <i>K-rich</i>            | ?     | Spanish    | Church of Santa Maria del Mar in Barcelona, Spain                      | [23] |
| Asc       | <i>Phoma sp.</i>                       | MB       | Stained glass | <i>K-rich</i>            | ?     | Spanish    | Church of Santa Maria del Mar in Barcelona, Spain                      | [23] |
| Bas       | <i>Rhodotorula minuta</i>              | MB       | Stained glass | <i>n.i.</i>              | 19th  | German     | Church of St. Michael and Johann Baptist in Brakel, Belgium            | [37] |
| Asc       | <i>Stanjemonium ochroroseum</i>        | MB       | Stained glass | <i>n.i.</i>              | 19th  | German     | Protestant chapel Stockkämpen, Germany                                 | [37] |
| Bas       | <i>Ustilago spp.</i>                   | MB       | Stained glass | <i>n.i.</i>              | 19th  | German     | Protestant chapel Stockkämpen, Germany                                 | [37] |
| Asc       | <i>Verticillium spp.</i>               | MB       | Stained glass | <i>n.i.</i>              | 19th  | German     | Protestant chapel Stockkämpen, Germany                                 | [37] |
| Asc       | <i>Cladosporium</i>                    | Mor      | Stained glass | <i>Na-rich</i>           | 20th  | German     | Church of Bad Driburg, Germany                                         | [22] |
| U. fungus | Fungi                                  | Mor      | Stained glass | Na-rich                  | 19th  | German     | Protestant chapel of Stockkämpen                                       | [22] |
| U. fungus | Fungi                                  | Mor      | Stained glass | Na-rich                  | 19th  | German     | Church of St. Michael and Johann Baptist in Brakel                     | [22] |
| Asc       | <i>Hortaea werneckii</i>               | Cult-MB  | Stained glass | <i>Na-rich</i>           | 20th  | France     | Museu do Estado do Pará, in northern Brazil                            | [36] |
| Asc       | <i>Fusarium oxysporum</i>              | Cult-MB  | Stained glass | <i>Na-rich</i>           | 19th  | Portugal   | Mausoleum of the family Britto Pontesin Belém, Brazil                  | [36] |
| Asc       | <i>Myrothecium inundatum</i>           | Cult-MB  | Stained glass | <i>Na-rich</i>           | 19th  | Portugal   | Mausoleum of the family Britto Pontesin Belém, Brazil                  | [36] |
| U. fungus | Fungi                                  | Mor      | Stained glass | K-rich                   | 12 th | German     | Cathedral of Altenberg, Germany                                        | [22] |
| U. fungus | <i>Uncultured ectomycorrhiza</i>       | MB       | Glazed tiles  | High-Pb                  | 20th  | Italian    | Grande Albergo Ausonia & Hungaria (Venice, Italy)                      | [26] |
| Asc       | <i>Aspergillus fumigatus</i>           | Cult-MB  | Glazed tiles  | Pb-alkali Sn - opacified | 18th  | Portuguese | “Great View of Lisbon”Panel, Lisbon Museu Nacional do Azulejo Portugal | [30] |
| Asc       | <i>Aspergillus sp.</i>                 | Cult-Mor | Glazed tiles  | Pb-alkali Sn - opacified | 18th  | Portuguese | Convento Santo António in Recife, Brazil                               | [31] |
| Asc       | <i>Aureobasidium pullulans</i>         | MB       | Glazed tiles  | High-Pb                  | 20th  | Italian    | Grande Albergo Ausonia & Hungaria, Italy                               | [26] |
| Asc       | <i>Capnobotryella sp.</i>              | Cult-MB  | Glazed tiles  | Pb-alkali Sn - opacified | 19th  | Portuguese | Pena National Palace, Portugal                                         | [29] |

|           |                                       |          |              |                          |      |            |                                                                        |      |
|-----------|---------------------------------------|----------|--------------|--------------------------|------|------------|------------------------------------------------------------------------|------|
| Asc       | <i>Capnobotryella</i> sp.             | Cult-MB  | Glazed tiles | Pb-alkali Sn - opacified | 19th | Portuguese | Pena National Palace, Portugal                                         | [29] |
| Asc       | <i>Capnobotryella</i> sp.             | Cult-MB  | Glazed tiles | Pb-alkali Sn - opacified | 19th | Portuguese | Pena National Palace, Portugal                                         | [29] |
| Asc       | <i>Capnodiales</i> sp.                | MB       | Glazed tiles | Pb-alkali Sn - opacified | 18th | Portuguese | Casa da Pesca, Portugal                                                | [28] |
| Asc       | <i>Capnodiales</i> sp.                | MB       | Glazed tiles | Pb-alkali Sn - opacified | 18th | Portuguese | Casa da Pesca, Portugal                                                | [28] |
| Asc       | <i>Capronia</i> sp.                   | MB       | Glazed tiles | Pb-alkali Sn - opacified | 19th | Portuguese | Pena National Palace, Portugal                                         | [29] |
| Asc       | <i>Devriesia imbrexigena</i>          | Cult-MB  | Glazed tiles | Pb-alkali Sn - opacified | 18th | Portuguese | Pena National Palace, Portugal                                         | [38] |
| Asc       | <i>Devriesia modesta</i>              | Cult-MB  | Glazed tiles | Pb-alkali Sn - opacified | 18th | Portuguese | Casa da Pesca, Portugal                                                | [28] |
| Asc       | <i>Devriesia modesta strain</i>       | Cult-MB  | Glazed tiles | Pb-alkali Sn - opacified | 18th | Portuguese | Casa da Pesca, Portugal                                                | [28] |
| Asc       | <i>Devriesia Neodevriesiaceae</i> sp. | Cult-MB  | Glazed tiles | Pb-alkali Sn - opacified | 18th | Portuguese | Casa da Pesca, Portugal                                                | [28] |
| Asc       | <i>Devriesia xanthorrhoeae</i>        | Cult-MB  | Glazed tiles | Pb-alkali Sn - opacified | 18th | Portuguese | Casa da Pesca, Portugal                                                | [28] |
| Asc       | <i>Devriesia xanthorrhoeaec</i>       | Cult-MB  | Glazed tiles | Pb-alkali Sn - opacified | 18th | Portuguese | Casa da Pesca, Portugal                                                | [28] |
| Bas       | <i>Fellomyces sichuanensis</i> strain | Cult-MB  | Glazed tiles | Pb-alkali Sn - opacified | 19th | Portuguese | Pena National Palace, Portugal                                         | [29] |
| U. fungus | Fungal endophyte                      | MB       | Glazed tiles | High-Pb                  | 20th | Italian    | Grande Albergo Ausonia & Hungaria, Italy                               | [26] |
| Asc       | <i>Fusarium</i> sp.                   | Cult-Mor | Glazed tiles | Pb-alkali Sn - opacified | 18th | Portuguese | Convento Santo António in Recife, Brazil                               | [31] |
| Asc       | <i>Geotrichum</i> sp.                 | Cult-Mor | Glazed tiles | Pb-alkali Sn - opacified | 18th | Portuguese | Convento Santo António in Recife, Brazil                               | [31] |
| Asc       | <i>Hortaea thailandica</i>            | MB       | Glazed tiles | Pb-alkali Sn - opacified | 19th | Portuguese | Pena National Palace, Portugal                                         | [29] |
| Bas       | <i>Kockovaella schimae</i> strain     | MB       | Glazed tiles | Pb-alkali Sn - opacified | 19th | Portuguese | Pena National Palace, Portugal                                         | [29] |
| Asc       | <i>Monodictys</i> sp.                 | Cult-Mor | Glazed tiles | Pb-alkali Sn - opacified | 18th | Portuguese | Convento Santo António in Recife, Brazil                               | [31] |
| U. fungus | <i>Mycelia sterilia</i>               | Cult-Mor | Glazed tiles | Pb-alkali Sn - opacified | 18th | Portuguese | Convento Santo António in Recife, Brazil                               | [31] |
| Asc.      | <i>Neodevriesiaceae</i> sp.           | Cult-MB  | Glazed tiles | Pb-alkali Sn - opacified | 18th | Portuguese | Casa da Pesca, Portugal                                                | [28] |
| Asc.      | <i>Penicillium</i> sp.                | Cult-Mor | Glazed tiles | Pb-alkali Sn - opacified | 18th | Portuguese | “Great View of Lisbon”Panel, Lisbon Museu Nacional do Azulejo Portugal | [30] |

|      |                                 |          |              |                          |      |            |                                          |      |
|------|---------------------------------|----------|--------------|--------------------------|------|------------|------------------------------------------|------|
| Asc. | <i>Penicillium</i> sp.          | Cult-Mor | Glazed tiles | Pb-alkali Sn - opacified | 18th | Portuguese | Convento Santo António in Recife, Brazil | [31] |
| Asc. | <i>Phoma herbarum</i>           | MB       | Glazed tiles | High-Pb                  | 20th | Italian    | Grande Albergo Ausonia & Hungaria, Italy | [26] |
| Asc. | <i>Saccharata</i> sp.           | MB       | Glazed tiles | Pb-alkali Sn - opacified | 19th | Portuguese | Pena National Palace, Portugal           | [29] |
| Bas. | <i>Sporobolomyces coprosmae</i> | MB       | Glazed tiles | Pb-alkali Sn - opacified | 20th | Italian    | Grande Albergo Ausonia & Hungaria, Italy | [26] |
| Asc. | <i>Stigmina</i> sp.             | MB       | Glazed tiles | Pb-alkali Sn - opacified | 19th | Portuguese | Pena National Palace, Portugal           | [29] |
| Asc. | <i>Umbilicaria calvescens</i>   | MB       | Glazed tiles | Pb-alkali Sn - opacified | 19th | Portuguese | Pena National Palace, Portugal           | [29] |

<sup>1</sup> Division: Asc. Ascomycota; Bas. Basidiomycota; U. Fungi – Unidentified fungus

<sup>2</sup> Identification method: Culture-dependent; Mor. - Morphological and sensing; DNA. – DNA based analysis.

<sup>3</sup> Date cent. - Date (century)

<sup>4</sup> Prov. – Provenance

a

Table S2 – Bacteria reported on historical stained glass windows and glazed tiles in the literature.

| Phylum <sup>1</sup> | Genera/species                       | Ident. Method <sup>2</sup> | Tipology      | Type of silicate glass | Date (cent.) <sup>3</sup> | Prov. <sup>4</sup> | Monument/Collection, Country                | Reference |
|---------------------|--------------------------------------|----------------------------|---------------|------------------------|---------------------------|--------------------|---------------------------------------------|-----------|
| Actinobacteria      | <i>Arthrobacter agilis</i>           | Cult-MB                    | Stained glass | <i>Na-rich</i>         | 15th                      | Italian            | “Nativita” in the Florence Cathedral, Italy | [25]      |
| Actinobacteria      | <i>Arthrobacter crystallopoietes</i> | Cult-MB                    | Stained glass | <i>Na-rich</i>         | 15th                      | Italian            | “Nativita” in the Florence Cathedral, Italy | [25]      |
| Actinobacteria      | <i>Arthrobacter</i> sp.              | Cult-MB                    | Stained glass | <i>Na-rich</i>         | 15th                      | Italian            | “Nativita” in the Florence Cathedral, Italy | [25]      |
| Actinobacteria      | <i>Leucobacter albus</i>             | Cult-MB                    | Stained glass | <i>Na-rich</i>         | 15th                      | Italian            | “Nativita” in the Florence Cathedral, Italy | [25]      |
| Actinobacteria      | <i>Leucobacter komagatae</i>         | Cult-MB                    | Stained glass | <i>Na-rich</i>         | 15th                      | Italian            | “Nativita” in the Florence Cathedral, Italy | [25]      |
| Firmicutes          | <i>Bacillus firmus</i>               | Cult-MB                    | Stained glass | <i>Na-rich</i>         | 15th                      | Italian            | “Nativita” in the Florence Cathedral, Italy | [25]      |
| Firmicutes          | <i>Bacillus licheniformis</i>        | Cult-MB                    | Stained glass | <i>Na-rich</i>         | 15th                      | Italian            | “Nativita” in the Florence Cathedral, Italy | [25]      |
| Firmicutes          | <i>Bacillus megaterium</i>           | Cult-MB                    | Stained glass | <i>Na-rich</i>         | 15th                      | Italian            | “Nativita” in the Florence Cathedral, Italy | [25]      |
| Firmicutes          | <i>Bacillus mojavensis</i>           | Cult-MB                    | Stained glass | <i>Na-rich</i>         | 15th                      | Italian            | “Nativita” in the Florence Cathedral, Italy | [25]      |
| Firmicutes          | <i>Bacillus pumilus</i>              | Cult-MB                    | Stained glass | <i>Na-rich</i>         | 15th                      | Italian            | “Nativita” in the Florence Cathedral, Italy | [25]      |
| Firmicutes          | <i>Bacillus simplex</i>              | Cult-MB                    | Stained glass | <i>Na-rich</i>         | 15th                      | Italian            | “Nativita” in the Florence Cathedral, Italy | [25]      |
| Firmicutes          | <i>Bacillus thuringiensis</i>        | Cult-MB                    | Stained glass | <i>Na-rich</i>         | 15th                      | Italian            | “Nativita” in the Florence Cathedral, Italy | [25]      |
| Firmicutes          | <i>Bacillus vallismortis</i>         | Cult-MB                    | Stained glass | <i>Na-rich</i>         | 15th                      | Italian            | “Nativita” in the Florence Cathedral, Italy | [25]      |
| Firmicutes          | <i>Paenibacillus amylolyticus</i>    | Cult-MB                    | Stained glass | <i>Na-rich</i>         | 15th                      | Italian            | “Nativita” in the Florence Cathedral, Italy | [25]      |
| Firmicutes          | <i>Paenibacillus kribbensis</i>      | Cult-MB                    | Stained glass | <i>Na-rich</i>         | 15th                      | Italian            | “Nativita” in the Florence Cathedral, Italy | [25]      |
| Firmicutes          | <i>Paenibacillus pabuli</i>          | Cult-MB                    | Stained glass | <i>Na-rich</i>         | 15th                      | Italian            | “Nativita” in the Florence Cathedral, Italy | [25]      |
| Firmicutes          | <i>Paenibacillus polymyxa</i>        | Cult-MB                    | Stained glass | <i>Na-rich</i>         | 15th                      | Italian            | “Nativita” in the Florence Cathedral, Italy | [25]      |
| Proteobacteria      | <i>Brevundimonas subvibrioides</i>   | Cult-MB                    | Stained glass | <i>Na-rich</i>         | 15th                      | Italian            | “Nativita” in the Florence Cathedral, Italy | [25]      |
| Proteobacteria      | <i>Brevundimonas variabilis</i>      | Cult-MB                    | Stained glass | <i>Na-rich</i>         | 15th                      | Italian            | “Nativita” in the Florence Cathedral, Italy | [25]      |
| Proteobacteria      | <i>Stenotrophomonas maltophilia</i>  | Cult-MB                    | Stained glass | <i>Na-rich</i>         | 15th                      | Italian            | “Nativita” in the Florence Cathedral, Italy | [25]      |

|                |                                           |         |               |                |             |         |                                                   |      |
|----------------|-------------------------------------------|---------|---------------|----------------|-------------|---------|---------------------------------------------------|------|
| U. Bacteria    | <i>uncultured soil bacterium</i>          | Cult-MB | Stained glass | <i>Na-rich</i> | 15th        | Italian | “Nativita” in the Florence Cathedral, Italy       | [25] |
| Proteobacteria | <i>Delftia acidovorans</i>                | MB      | Stained glass | <i>K-rich</i>  | 15th (20th) | Spanish | Church of Santa Maria del Mar in Barcelona, Spain | [23] |
| Proteobacteria | <i>Delftia</i> sp.                        | MB      | Stained glass | <i>K-rich</i>  | 15th (20th) | Spanish | Church of Santa Maria del Mar in Barcelona, Spain | [23] |
| Proteobacteria | <i>Pseudomonas stutzeri</i>               | MB      | Stained glass | <i>K-rich</i>  | 15th (20th) | Spanish | Church of Santa Maria del Mar in Barcelona, Spain | [23] |
| Proteobacteria | <i>Ralstonia pickettii</i>                | MB      | Stained glass | <i>K-rich</i>  | 14th        | Spanish | Cathedral of Tarragona, Spain                     | [23] |
| Proteobacteria | <i>Ralstonia</i> sp.                      | MB      | Stained glass | <i>K-rich</i>  | 14th        | Spanish | Cathedral of Tarragona, Spain                     | [23] |
| Proteobacteria | <i>Variovorax paradoxus</i>               | MB      | Stained glass | <i>K-rich</i>  | 14th        | Spanish | Cathedral of Tarragona, Spain                     | [23] |
| Actinobacteria | <i>Actinomyces</i>                        | MB      | Stained glass | <i>Pb-rich</i> | 19th        | German  | Protestant chapel Stockkämpen                     | [47] |
| Actinobacteria | <i>Arthrobacter</i>                       | MB      | Stained glass | <i>K-rich</i>  | 15th (20th) | Spanish | Church of Santa Maria del Mar in Barcelona, Spain | [23] |
| Actinobacteria | <i>Cellulomonas</i> sp.                   | MB      | Stained glass | <i>K-rich</i>  | 14th        | Spanish | Cathedral of Tarragona, Spain                     | [23] |
| Actinobacteria | <i>Kocuria aegyptia</i>                   | MB      | Stained glass | <i>K-rich</i>  | 14th        | Spanish | Cathedral of Tarragona, Spain                     | [23] |
| Actinobacteria | <i>Kocuria rosea</i>                      | MB      | Stained glass | <i>K-rich</i>  | 14th        | Spanish | Cathedral of Tarragona, Spain                     | [23] |
| Actinobacteria | <i>Kocuria</i> sp.                        | MB      | Stained glass | <i>K-rich</i>  | 14th        | Spanish | Cathedral of Tarragona, Spain                     | [23] |
| Actinobacteria | Uncultured <i>Kocuria</i> sp.             | MB      | Stained glass | <i>K-rich</i>  | 14th        | Spanish | Cathedral of Tarragona, Spain                     | [23] |
| Actinobacteria | <i>Micrococcus</i> sp.                    | MB      | Stained glass | <i>K-rich</i>  | 14th        | Spanish | Cathedral of Tarragona, Spain                     | [23] |
| Actinobacteria | Uncultured <i>Actinobacterium</i>         | MB      | Stained glass | <i>K-rich</i>  | 14th        | Spanish | Cathedral of Tarragona, Spain                     | [23] |
| Bacteroidetes  | <i>Bacteroidetes</i> bacteria             | MB      | Stained glass | <i>K-rich</i>  | 14th        | Spanish | Cathedral of Tarragona, Spain                     | [23] |
| Bacteroidetes  | Uncultured <i>Bacteroidetes</i> bacterium | MB      | Stained glass | <i>K-rich</i>  | 15th (20th) | Spanish | Church of Santa Maria del Mar in Barcelona, Spain | [23] |
| Bacteroidetes  | <i>Prevotella</i> sp.                     | MB      | Stained glass | <i>K-rich</i>  | 14th        | Spanish | Cathedral of Tarragona, Spain                     | [23] |
| Bacteroidetes  | <i>Sediminibacterium</i> sp.              | MB      | Stained glass | <i>K-rich</i>  | 14th        | Spanish | Cathedral of Tarragona, Spain                     | [23] |
| Firmicutes     | <i>Bacillus pumilus</i>                   | MB      | Stained glass | <i>K-rich</i>  | 15th (20th) | Spanish | Church of Santa Maria del Mar in Barcelona, Spain | [23] |
| Firmicutes     | <i>Enterococcus</i> sp.                   | MB      | Stained glass | <i>K-rich</i>  | 14th        | Spanish | Cathedral of Tarragona, Spain                     | [23] |
| Nitrospirae    | <i>Nitrospira</i>                         | MB      | Stained glass | <i>Pb-rich</i> | 19th        | German  | Protestant chapel Stockkämpen                     | [47] |
| Proteobacteria | <i>Acinetobacter</i> sp.                  | MB      | Stained glass | <i>K-rich</i>  | 14 th       | Spanish | Cathedral of Tarragona, Spain                     | [23] |
| Proteobacteria | <i>Acinetobacter</i> sp.                  | MB      | Stained glass | <i>K-rich</i>  | 14th        | Spanish | Cathedral of Tarragona, Spain                     | [23] |
| Proteobacteria | <i>Bradyrhizobium elkanii</i>             | MB      | Stained glass | <i>K-rich</i>  | 14th        | Spanish | Cathedral of Tarragona, Spain                     | [23] |
| Proteobacteria | <i>Bradyrhizobium</i> sp.                 | MB      | Stained glass | <i>K-rich</i>  | 14th        | Spanish | Cathedral of Tarragona, Spain                     | [23] |
| Proteobacteria | <i>Delftia acidovorans</i>                | MB      | Stained glass | <i>K-rich</i>  | 14th        | Spanish | Cathedral of Tarragona, Spain                     | [23] |
| Proteobacteria | <i>Methylobacterium</i>                   | MB      | Stained glass | <i>K-rich</i>  | 14th        | Spanish | Cathedral of Tarragona, Spain                     | [23] |
| Proteobacteria | <i>Myxococcus xanthus</i>                 | MB      | Stained glass | <i>K-rich</i>  | 15th (20th) | Spanish | Church of Santa Maria del Mar in Barcelona, Spain | [23] |
| Proteobacteria | <i>Thermomonas dokdonensis</i>            | MB      | Stained glass | <i>K-rich</i>  | 14th        | Spanish | Cathedral of Tarragona, Spain                     | [23] |
| U. Bacteria    | <i>Uncultured bacterium</i>               | MB      | Stained glass | <i>K-rich</i>  | 14th        | Spanish | Cathedral of Tarragona, Spain                     | [23] |
| U. Bacteria    | Uncultured soil bacterium clone           | MB      | Stained glass | <i>K-rich</i>  | 14th        | Spanish | Cathedral of Tarragona, Spain                     | [23] |
| U. Bacteria    | <i>Bacteria</i>                           | Mor-MB  | Stained glass | <i>K-rich</i>  | 15th        | Flemish | Cartuja de Miraflores Monastery, Burgos, Spain.   | [21] |
| U. Bacteria    | <i>Bacteria</i>                           | MB      | Stained glass | <i>Pb-rich</i> | 19th        | German  | Protestant chapel Stockkämpen                     | [47] |
| U. Bacteria    | unspecified Bacteria                      | Mor     | Stained glass | <i>Na-rich</i> | 19th        | German  | Protestant chapel of Stockkämpen                  | [22] |
| U. Bacteria    | unspecified Bacteria                      | Mor     | Stained glass | <i>Na-rich</i> | 19th        | German  | Protestant chapel of Stockkämpen                  | [22] |
| U. Bacteria    | unspecified Bacteria                      | Mor     | Stained glass | <i>Na-rich</i> | 19th        | German  | Protestant chapel of Stockkämpen                  | [22] |

|                    |                                          |     |               |                          |      |            |                                          |      |
|--------------------|------------------------------------------|-----|---------------|--------------------------|------|------------|------------------------------------------|------|
| <i>U. Bacteria</i> | unspecified Bacteria                     | Mor | Stained glass | <i>Na-rich</i>           | 19th | German     | Protestant chapel of Stockkämpen         | [22] |
| <i>U. Bacteria</i> | unspecified Bacteria                     | Mor | Stained glass | <i>Na-rich</i>           | 19th | German     | Protestant chapel of Stockkämpen         | [22] |
| <i>U. Bacteria</i> | Bacteria                                 | Mor | Stained glass | <i>K-rich</i>            | 13th | German     | Cathedral of Altenberg                   | [22] |
| Actinobacteria     | Uncultured Microcella sp.                | MB  | Glazed tile   | High-Pb                  | 20th | Italian    | Grande Albergo Ausonia & Hungaria, Italy | [26] |
| Actinobacteria     | <i>Modestobacter</i> sp.                 | MB  | Glazed tile   | Pb-alkali Sn-opacified   | 19th | Portuguese | Pena National Palace, Portugal           | [29] |
| Actinobacteria     | <i>Pseudonocardia</i> bacterium          | MB  | Glazed tile   | High-Pb                  | 20th | Italian    | Grande Albergo Ausonia & Hungaria, Italy | [26] |
| Actinobacteria     | <i>Rhodovastum atsumiense</i> (AB381935) | MB  | Glazed tile   | Pb-alkali Sn - opacified | 19th | Portuguese | Pena National Palace, Portugal           | [29] |
| Actinobacteria     | Uncultured actinobacterium               | MB  | Glazed tile   | High-Pb                  | 20th | Italian    | Grande Albergo Ausonia & Hungaria, Italy | [26] |
| Actinobacteria     | <i>Yonghaparkia alkaliphila</i>          | MB  | Glazed tile   | High-Pb                  | 20th | Italian    | Grande Albergo Ausonia & Hungaria, Italy | [26] |
| Actinobacteria.    | <i>Microcella putealis</i>               | MB  | Glazed tile   | High-Pb                  | 20th | Italian    | Grande Albergo Ausonia & Hungaria, Italy | [26] |
| Bacteroidetes      | <i>Spirosoma aquatica</i>                | MB  | Glazed tile   | High-Pb                  | 20th | Italian    | Grande Albergo Ausonia & Hungaria, Italy | [26] |
| Bacteroidetes      | Uncultured Bacteroidetes                 | MB  | Glazed tile   | High-Pb                  | 20th | Italian    | Grande Albergo Ausonia & Hungaria, Italy | [26] |
| Bacteroidetes      | Uncultured Bacteroidetes                 | MB  | Glazed tile   | High-Pb                  | 20th | Italian    | Grande Albergo Ausonia & Hungaria, Italy | [26] |
| Chloroflexi        | <i>Anaerolinea thermophila</i>           | MB  | Glazed tile   | Pb-alkali Sn-opacified   | 19th | Portuguese | Pena National Palace, Portugal           | [29] |
| Firmicutes         | Uncultured Flexibacteriaceae             | MB  | Glazed tile   | High-Pb                  | 20th | Italian    | Grande Albergo Ausonia & Hungaria, Italy | [26] |
| Proteobacteria     | <i>Aurantimonas</i> sp.                  | MB  | Glazed tile   | Pb-alkali Sn-opacified   | 19th | Portuguese | Pena National Palace (Sintra, Portugal)  | [29] |
| Proteobacteria     | <i>Beijerinckia fluminensis</i>          | MB  | Glazed tile   | Pb-alkali Sn-opacified   | 19th | Portuguese | Pena National Palace, Portugal           | [29] |
| Proteobacteria     | <i>Mesorhizobium</i> sp.                 | MB  | Glazed tile   | High-Pb                  | 20th | Italian    | Grande Albergo Ausonia & Hungaria, Italy | [26] |
| Proteobacteria     | <i>Methylibium</i> sp.                   | MB  | Glazed tile   | High-Pb                  | 20th | Italian    | Grande Albergo Ausonia & Hungaria, Italy | [26] |
| Proteobacteria     | <i>Oxalicibacterium faecigallinarum</i>  | MB  | Glazed tile   | High-Pb                  | 20th | Italian    | Grande Albergo Ausonia & Hungaria, Italy | [26] |
| Proteobacteria     | <i>Sphingomonas</i> sp.                  | MB  | Glazed tile   | Pb-alkali Sn-opacified   | 19th | Portuguese | Pena National Palace, Portugal           | [29] |
| Proteobacteria     | Uncultured alfa proteobacterium          | MB  | Glazed tile   | High-Pb                  | 20th | Italian    | Grande Albergo Ausonia & Hungaria, Italy | [26] |
| Proteobacteria     | Uncultured alfa proteobacterium          | MB  | Glazed tile   | High-Pb                  | 20th | Italian    | Grande Albergo Ausonia & Hungaria, Italy | [26] |
| Proteobacteria     | Uncultured beta proteobacterium          | MB  | Glazed tile   | High-Pb                  | 20th | Italian    | Grande Albergo Ausonia & Hungaria, Italy | [26] |
| Proteobacteria     | Uncultured beta proteobacterium x        | MB  | Glazed tile   | High-Pb                  | 20th | Italian    | Grande Albergo Ausonia & Hungaria, Italy | [26] |
| Proteobacteria     | Uncultured Methylibium sp.               | MB  | Glazed tile   | High-Pb                  | 20th | Italian    | Grande Albergo Ausonia & Hungaria, Italy | [26] |
| <i>U. Bacteria</i> | Uncultured bacterium                     | MB  | Glazed tile   | High-Pb                  | 20th | Italian    | Grande Albergo Ausonia & Hungaria, Italy | [26] |
| <i>U. Bacteria</i> | Uncultured bacterium                     | MB  | Glazed tile   | High-Pb                  | 20th | Italian    | Grande Albergo Ausonia & Hungaria, Italy | [26] |
| <i>U. Bacteria</i> | Uncultured soil bacterium                | MB  | Glazed tile   | High-Pb                  | 20th | Italian    | Grande Albergo Ausonia & Hungaria, Italy | [26] |

<sup>1</sup> Division: *U. Bacteria* – Unidentified Bacteria

<sup>2</sup> Identification method: Culture-dependent; Mor. - Morphological and sensing; DNA. – DNA based analysis.

<sup>3</sup> Date (cent.) - Date (century)

<sup>4</sup> Prov. – Provenance

Table S3 – Prototrophs (cyanobacteria and microalgae), Protista and Rotifera reported on historical stained glass windows and glazed tiles in the literature.

| Phylum             | Species                                                                                                                        | Ident. Method <sup>1</sup> | Tipology     | Type of silicate glass   | Date (cent.) <sup>2</sup> | Prov. <sup>3</sup> | Monument/Collection, Country   | Reference |
|--------------------|--------------------------------------------------------------------------------------------------------------------------------|----------------------------|--------------|--------------------------|---------------------------|--------------------|--------------------------------|-----------|
| <b>Phototrophs</b> |                                                                                                                                |                            |              |                          |                           |                    |                                |           |
| Chlorophyta        | <i>Apatococcus lobatus</i> (Chodat) J. B. Petersen                                                                             | Cult-Mor                   | Glazed tiles | Pb-alkali Sn - opacified | 19th                      | Portuguese         | Pena National Palace, Portugal | [29]      |
| Chlorophyta        | <i>Bracteacoccus minutus</i> Schwarz                                                                                           | Cult-Mor                   | Glazed tiles | Pb-alkali Sn - opacified | 19th                      | Portuguese         | Pena National Palace, Portugal | [29]      |
| Chlorophyta        | <i>Desmococcus olivaceus</i> (Pers. Ex. Ach.) Laundon                                                                          | Cult-Mor                   | Glazed tiles | Pb-alkali Sn - opacified | 19th                      | Portuguese         | Pena National Palace, Portugal | [29]      |
| Chlorophyta        | <i>Diaphragma radiosum</i> Geitler                                                                                             | Cult-Mor                   | Glazed tiles | Pb-alkali Sn - opacified | 19th                      | Portuguese         | Pena National Palace, Portugal | [29]      |
| Chlorophyta        | <i>Dictyochloris pulchra</i> Deason & Herndon                                                                                  | Cult-Mor                   | Glazed tiles | Pb-alkali Sn - opacified | 19th                      | Portuguese         | Pena National Palace, Portugal | [29]      |
| Chlorophyta        | <i>Jaagiella alpicola</i> Vischer                                                                                              | Cult-Mor                   | Glazed tiles | Pb-alkali Sn - opacified | 19th                      | Portuguese         | Pena National Palace, Portugal | [29]      |
| Chlorophyta        | <i>Stichococcus bacillaris</i> Nägeli.                                                                                         | Cult-Mor                   | Glazed tiles | Pb-alkali Sn - opacified | 19th                      | Portuguese         | Pena National Palace, Portugal | [29]      |
| Chlorophyta        | <i>Trentepohlia monilia</i> Wildeman                                                                                           | Cult-Mor                   | Glazed tiles | Pb-alkali Sn - opacified | 19th                      | Portuguese         | Pena National Palace, Portugal | [29]      |
| Chlorophyta        | <i>Trentepohlia</i> sp.                                                                                                        | Cult-Mor                   | Glazed tiles | Pb-alkali Sn - opacified | 19th                      | Portuguese         | Pena National Palace, Portugal | [29]      |
| Chlorophyta        | <i>Ulothrix</i> sp.                                                                                                            | Cult-Mor                   | Glazed tiles | Pb-alkali Sn - opacified | 19th                      | Portuguese         | Pena National Palace, Portugal | [29]      |
| Charophyta         | <i>Klebsormidium flaccidum</i> (Kützing) P.C.Silva, K.R.Mattox & W.H.Blackwell var. <i>crassum</i> (R.Chodat) H.Ettl & Gärtner | Cult-Mor                   | Glazed tiles | Pb-alkali Sn - opacified | 19th                      | Portuguese         | Pena National Palace, Portugal | [29]      |
| Charophyta         | <i>Klebsormidium flaccidum</i> (Kützing) P.C.Silva, K.R.Mattox & W.H.Blackwell var. <i>nitens</i> (Kützing) T.Mrozinska        | Cult-Mor                   | Glazed tiles | Pb-alkali Sn - opacified | 19th                      | Portuguese         | Pena National Palace, Portugal | [29]      |
| Charophyta         | <i>Klebsormidium pseudostichococcus</i> (Heering) H.Ettl & Gärtner                                                             | Cult-Mor                   | Glazed tiles | Pb-alkali Sn - opacified | 19th                      | Portuguese         | Pena National Palace, Portugal | [29]      |
| Cyanobacteria      | <i>Aphanocapsa parietina</i> Nägeli                                                                                            | Cult-Mor                   | Glazed tiles | Pb-alkali Sn - opacified | 19th                      | Portuguese         | Pena National Palace, Portugal | [29]      |
| Cyanobacteria      | <i>Calothrix</i> sp.                                                                                                           | Cult-Mor                   | Glazed tiles | Pb-alkali Sn - opacified | 19th                      | Portuguese         | Pena National Palace, Portugal | [29]      |
| Cyanobacteria      | <i>Gloeocapsa</i> sp.                                                                                                          | Cult-Mor                   | Glazed tiles | Pb-alkali Sn - opacified | 19th                      | Portuguese         | Pena National Palace, Portugal | [29]      |
| Cyanobacteria      | <i>Gloeotheca</i> sp.                                                                                                          | Cult-Mor                   | Glazed tiles | Pb-alkali Sn - opacified | 19th                      | Portuguese         | Pena National Palace, Portugal | [29]      |
| Cyanobacteria      | <i>Nostoc commune</i> Vaucher ex Bornet & Flahault                                                                             | Cult-Mor                   | Glazed tiles | Pb-alkali Sn - opacified | 19th                      | Portuguese         | Pena National Palace, Portugal | [29]      |
| Cyanobacteria      | <i>Nostoc paludosum</i> (Kützing) Bornet & Flahault                                                                            | Cult-Mor                   | Glazed tiles | Pb-alkali Sn - opacified | 19th                      | Portuguese         | Pena National Palace, Portugal | [29]      |
| Cyanobacteria      | <i>Nostoc punctiforme</i> (Kützing) Hariot                                                                                     | Cult-Mor                   | Glazed tiles | Pb-alkali Sn - opacified | 19th                      | Portuguese         | Pena National Palace, Portugal | [29]      |
| Cyanobacteria      | <i>Plectonema edaphicum</i> (Elenkin) Vulina                                                                                   | Cult-Mor                   | Glazed tiles | Pb-alkali Sn - opacified | 19th                      | Portuguese         | Pena National Palace, Portugal | [29]      |
| Cyanobacteria      | <i>Tolypothrix distorta</i> Kützing                                                                                            | Cult-Mor                   | Glazed tiles | Pb-alkali Sn - opacified | 19th                      | Portuguese         | Pena National Palace, Portugal | [29]      |
| Chlorophyta        | <i>Oocystis solitaria</i> chloroplast (FJ968739)                                                                               | MB                         | Glazed tiles | Pb-alkali Sn - opacified | 18th                      | Portuguese         | Pena National Palace, Portugal | [29]      |
| Chlorophyta        | <i>Chlorella saccharophila</i> chloroplast                                                                                     | MB                         | Glazed tiles | Pb-alkali Sn - opacified | 18th                      | Portuguese         | Pena National Palace, Portugal | [29]      |
| Chlorophyta        | <i>Chlorella ellipsoidea</i> chloroplast                                                                                       | MB                         | Glazed tiles | Pb-alkali Sn - opacified | 18th                      | Portuguese         | Pena National Palace, Portugal | [29]      |
| Chlorophyta        | <i>Chlorella saccharophila</i> chloroplast                                                                                     | MB                         | Glazed tiles | Pb-alkali Sn - opacified | 18th                      | Portuguese         | Pena National Palace, Portugal | [29]      |
| Chlorophyta        | <i>Oocystis solitaria</i> chloroplast                                                                                          | MB                         | Glazed tiles | Pb-alkali Sn - opacified | 18th                      | Portuguese         | Pena National Palace, Portugal | [29]      |

|               |                                              |          |               |                          |      |            |                                          |      |
|---------------|----------------------------------------------|----------|---------------|--------------------------|------|------------|------------------------------------------|------|
| Chlorophyta   | <i>Oocystis solitaria</i> chloroplast        | MB       | Glazed tiles  | Pb-alkali Sn - opacified | 18th | Portuguese | Pena National Palace, Portugal           | [29] |
| Chlorophyta   | <i>Oocystis solitaria</i> chloroplast        | MB       | Glazed tiles  | Pb-alkali Sn - opacified | 18th | Portuguese | Pena National Palace, Portugal           | [29] |
| Cyanobacteria | <i>Tolypothrix</i> sp.                       | MB       | Glazed tiles  | Pb-alkali Sn - opacified | 18th | Portuguese | Pena National Palace, Portugal           | [29] |
| Cyanobacteria | <i>Chroococcidiopsis</i> sp.                 | MB       | Glazed tiles  | Pb-alkali Sn - opacified | 18th | Portuguese | Pena National Palace, Portugal           | [29] |
| Cyanobacteria | <i>Nostoc</i> sp.                            | MB       | Glazed tiles  | Pb-alkali Sn - opacified | 18th | Portuguese | Pena National Palace, Portugal           | [29] |
| Cyanobacteria | <i>Chroococcidiopsis</i> sp.                 | MB       | Glazed tiles  | Pb-alkali Sn - opacified | 18th | Portuguese | Pena National Palace, Portugal           | [29] |
| Chlorophyta   | <i>Apatococcus lobatos</i>                   | MB       | Glazed tiles  | Pb-alkali Sn - opacified | 18th | Portuguese | Pena National Palace, Portugal           | [29] |
| Chlorophyta   | <i>Trentepohlia</i> sp.                      | MB       | Glazed tiles  | Pb-alkali Sn - opacified | 18th | Portuguese | Pena National Palace, Portugal           | [29] |
| Chlorophyta   | <i>Chlorella saccharophila</i> (chloroplast) | MB       | Glazed tiles  | High-Pb                  | 20th | Italian    | Grande Albergo Ausonia & Hungaria, Italy | [26] |
| Cyanobacteria | Uncultured bacterium (cyanobacterium)        | MB       | Glazed tiles  | High-Pb                  | 20th | Italian    | Grande Albergo Ausonia & Hungaria, Italy | [26] |
| Chlorophyta   | <i>Rosenvingiella radicans</i>               | MB       | Glazed tiles  | High-Pb                  | 20th | Italian    | Grande Albergo Ausonia & Hungaria, Italy | [26] |
| Cyanobacteria | <i>Synechococcus lividus</i>                 | MB       | Glazed tiles  | High-Pb                  | 20th | Italian    | Grande Albergo Ausonia & Hungaria, Italy | [26] |
| Chlorophyta   | <i>Phycopeltis</i> sp. HBI HB-YN1202         | MB       | Glazed tiles  | Pb-alkali Sn - opacified | 18th | Portuguese | Casa da Pesca, Portugal                  | [28] |
| Cyanobacteria | Uncultures <i>Iphinoe</i> sp.                | MB       | Glazed tiles  | Pb-alkali Sn - opacified | 18th | Portuguese | Casa da Pesca, Portugal                  | [28] |
| Cyanobacteria | <i>Iphinoe spelaebios</i>                    | MB       | Glazed tiles  | Pb-alkali Sn - opacified | 18th | Portuguese | Casa da Pesca, Portugal                  | [28] |
| Chlorophyta   | <i>Oocystis solitaria</i> chloroplast        | MB       | Glazed tiles  | Pb-alkali Sn - opacified | 18th | Portuguese | Casa da Pesca, Portugal                  | [28] |
| Cyanobacteria | <i>Chroococcus</i> sp.                       | Cult-Mor | Glazed tiles  | Pb-alkali Sn - opacified | 17th | Portuguese | St. Francis Church and Convent, Brazil   | [27] |
| Cyanobacteria | <i>Cyanosarcina</i> sp.                      | Cult-Mor | Glazed tiles  | Pb-alkali Sn - opacified | 17th | Portuguese | St. Francis Church and Convent, Brazil   | [27] |
| Cyanobacteria | <i>Scytonema</i> sp.                         | Cult-Mor | Glazed tiles  | Pb-alkali Sn - opacified | 17th | Portuguese | St. Francis Church and Convent, Brazil   | [27] |
| Cyanobacteria | <i>Chroococcus</i> sp.                       | Cult-Mor | Glazed tiles  | Pb-alkali Sn - opacified | 17th | Portuguese | St. Francis Church and Convent, Brazil   | [27] |
| Cyanobacteria | <i>Chroococcus</i> sp.                       | Cult-Mor | Glazed tiles  | Pb-alkali Sn - opacified | 17th | Portuguese | St. Francis Church and Convent, Brazil   | [27] |
| Cyanobacteria | <i>Scytonema</i> sp.                         | Cult-Mor | Glazed tiles  | Pb-alkali Sn - opacified | 17th | Portuguese | St. Francis Church and Convent, Brazil   | [27] |
| Cyanobacteria | <i>Chroococcus</i> sp.                       | Cult-Mor | Glazed tiles  | Pb-alkali Sn - opacified | 17th | Portuguese | St. Francis Church and Convent, Brazil   | [27] |
| Cyanobacteria | <i>Chroococcus</i> sp.                       | Cult-Mor | Glazed tiles  | Pb-alkali Sn - opacified | 17th | Portuguese | St. Francis Church and Convent, Brazil   | [27] |
| Ochrophyta    | <i>Navicula</i> sp                           | Cult-Mor | Glazed tiles  | Pb-alkali Sn - opacified | 17th | Portuguese | St. Francis Church and Convent, Brazil   | [27] |
| Cyanobacteria | <i>Chroococcus</i> sp                        | Cult-Mor | Glazed tiles  | High-Pb                  | 19th | German     | Palacete Pinho, Brazil                   | [27] |
| Cyanobacteria | <i>Lygnbya</i> sp.                           | Cult-Mor | Glazed tiles  | High-Pb                  | 19th | German     | Palacete Pinho, Brazil                   | [27] |
| Cyanobacteria | <i>Chroococcus</i> sp.                       | Cult-Mor | Glazed tiles  | High-Pb                  | 19th | German     | Palacete Pinho, Brazil                   | [27] |
| Cyanobacteria | <i>Chroococcus</i> sp                        | Cult-Mor | Glazed tiles  | High-Pb                  | 19th | German     | Palacete Pinho, Brazil                   | [27] |
| Ochrophyta    | <i>Navicula</i> sp.                          | Cult-Mor | Glazed tiles  | High-Pb                  | 19th | German     | Palacete Pinho, Brazil                   | [27] |
| Chlorophyta   | <i>Chlorella saccharophila</i> chloroplast   | MB       | Glazed tiles  | High-Pb                  | 20th | Italian    | Grande Albergo Ausonia & Hungaria, Italy | [26] |
| Cyanobacteria | Uncultured cyanobacterium                    | MB       | Glazed tiles  | High-Pb                  | 20th | Italian    | Grande Albergo Ausonia & Hungaria, Italy | [26] |
| Cyanobacteria | <i>Gloeocapsa</i> sp.                        | Mor      | Stained glass | Na-rich                  | 19th | France     | Mausoleum of the Assis Chermont, Brazil  | [24] |

|               |                                  |     |               |         |      |         |                                                           |      |
|---------------|----------------------------------|-----|---------------|---------|------|---------|-----------------------------------------------------------|------|
| Cyanobacteria | <i>Oscillatoria</i> sp.          | Mor | Stained Glass | Na-rich | 19th | France  | Mausoleum of the Assis Chermont, Brazil                   | [36] |
| <b>Others</b> |                                  |     |               |         |      |         |                                                           |      |
| Protista      | <i>Stramenopile labyrinthula</i> | MB  | Stained glass | K-rich  | 15th | Flemish | Cartuja de Miraflores Monastery, Burgos, Spain.           | [21] |
| Rotifera      | <i>Encentrum</i>                 | Mor | Stained glass | Na-rich | 19th | France  | Mausoleum of the Assis Chermont in Belém, northern Brazil | [24] |

<sup>1</sup> Identification method: Culture-dependent; Mor. - Morphological and sensing; DNA. – DNA based analysis.

<sup>2</sup> Date cent. - Date (century)

<sup>3</sup> Prov. – Provenance
